# Supplementary material
Source: PubMed Central journal article supplement (PMC10871027)
Supplement: NIHMS1958991-supplement-Supplementary_Figures.pdf [file NIHMS1958991-supplement-Supplementary_Figures.pdf]

## **Characterization Of HOXB13 Expression Patterns In Localized And Metastatic Castration Resistant Prostate Cancer.**

Radhika A. Patel, Erolcan Sayar, Ilsa Coleman, Martine P. Roudier, Brian Hanratty, Jin-Yih Low, David Goodrich, Azra Ajkunic, Ruth Dumpit, Caner Ercan, Nina Salama, William B. Isaacs, Jonathan I. Epstein, Angelo M. De Marzo, Bruce J. Trock, Jun Luo, W Nathaniel Brennen, Maria Tretiakova, Funda Vakar-Lopez, Lawrence D. True, Eva Corey, Colm Morrissey, Peter S. Nelson, Paula J. Hurley, Roman Gulati, Michael C. Haffner

**Supplementary Figure 1.** Patel, Sayar et al.

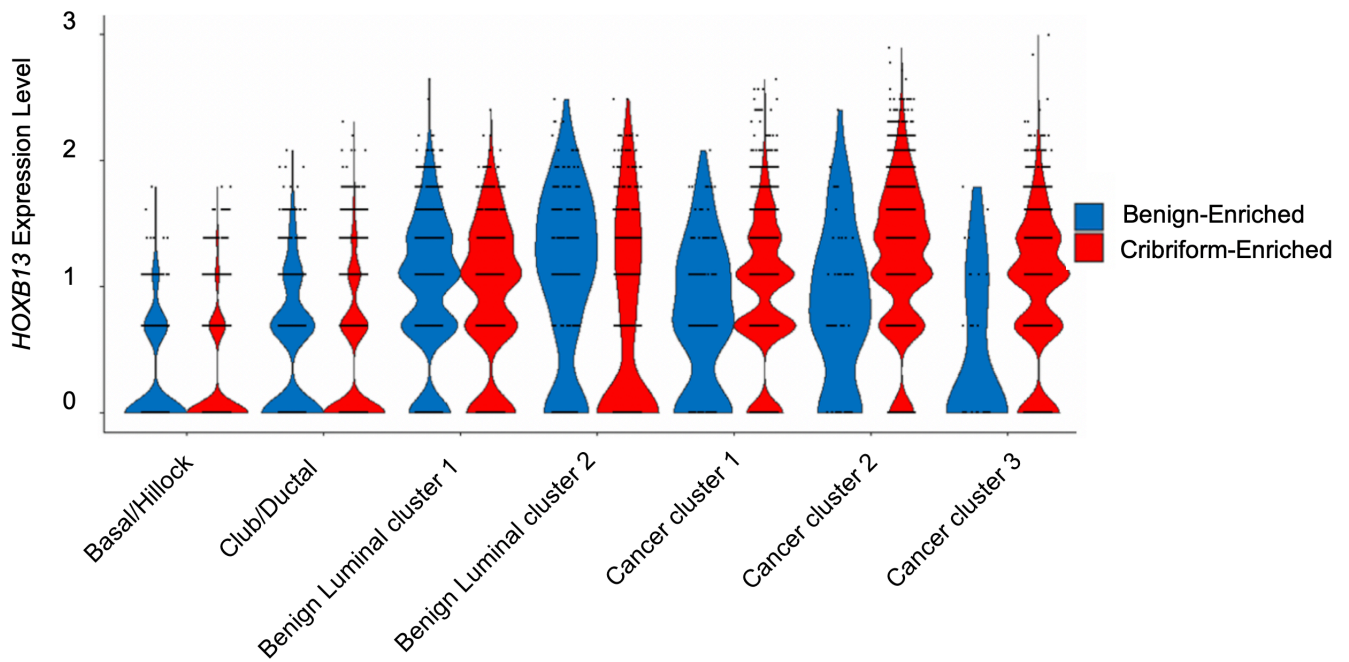

**Supplementary Figure 1.** Analyses of previously published scRNA-seq data (PMID: 36229464) from radical prostatectomy specimens reveals high levels of HOXB13 RNA expression in both benign and cancer luminal epithelial cells and lower expression in basal/Hillock and club/ductal cells.

**Supplementary Figure 2.** *Patel, Sayar et al.*

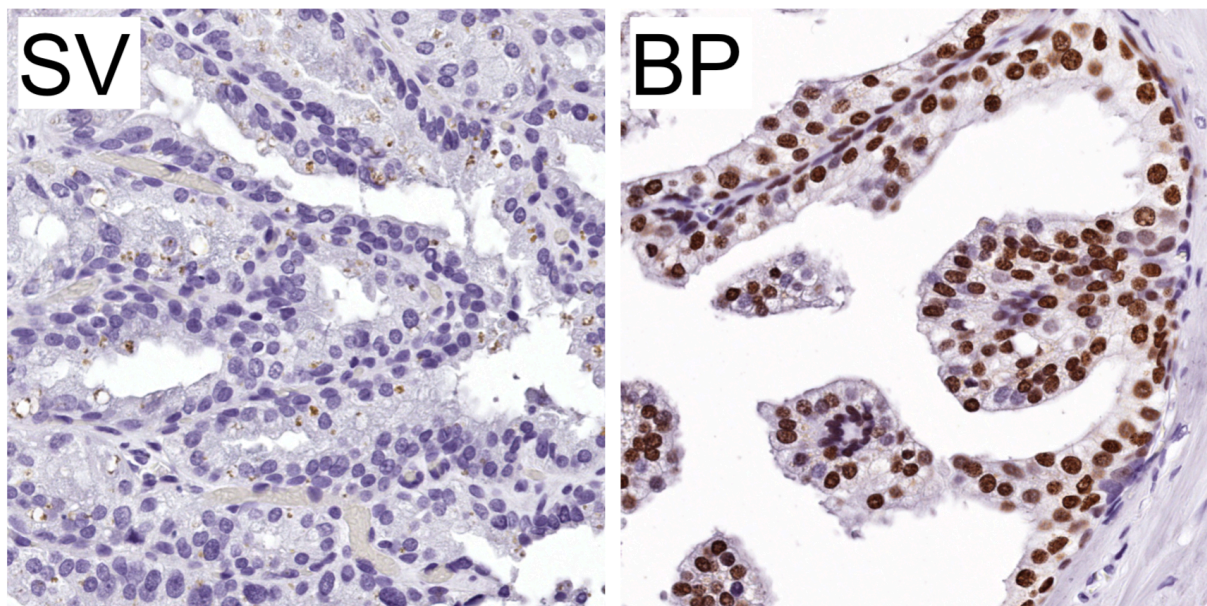

**Supplementary Figure 2.** HOXB13 is expressed in benign human prostate epithelium (BP), but not in seminal vesicle/ejaculatory duct tissue.



**Supplementary Figure 3.** Patel, Sayar et al.

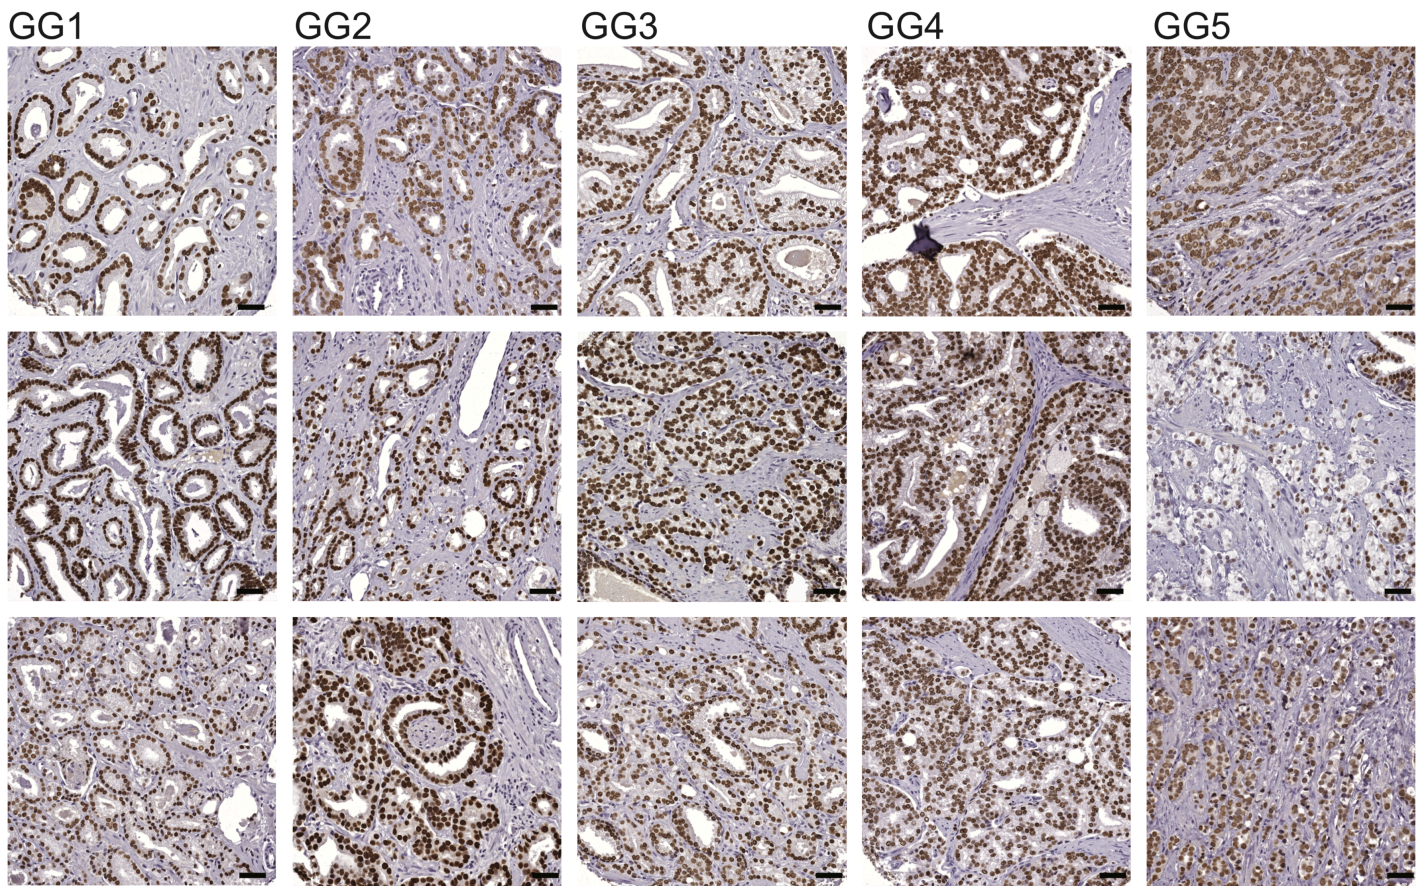

**Supplementary Figure 3.** Representative micrographs of HOXB13 IHC across different grade groups in the radical prostatectomy cohort. Scale bar indicated 50  $\mu$ m.



**Supplementary Figure 4.** Patel, Sayar et al.

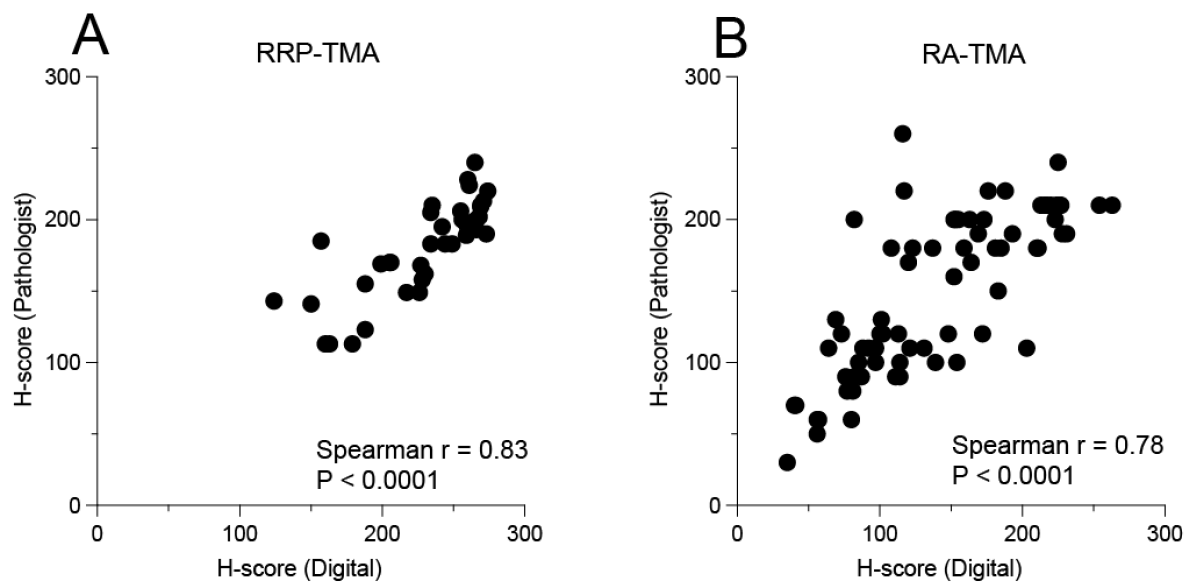

**Supplementary Figure 4.** Correlation between semiquantitative, expert pathologist determined HOXB13 protein expression H-score (Pathologist, y-axis) and quantitative digital image analysis-based HOXB13 H-scores (Digital, x-axis) for N=38 matched localized (A) and matched N=71 metastatic (B) tumor samples. For digital image analysis, Digitized slides were analyzed with QuPath-0.4.3.

**Supplementary Figure 5.** Patel, Sayar et al.

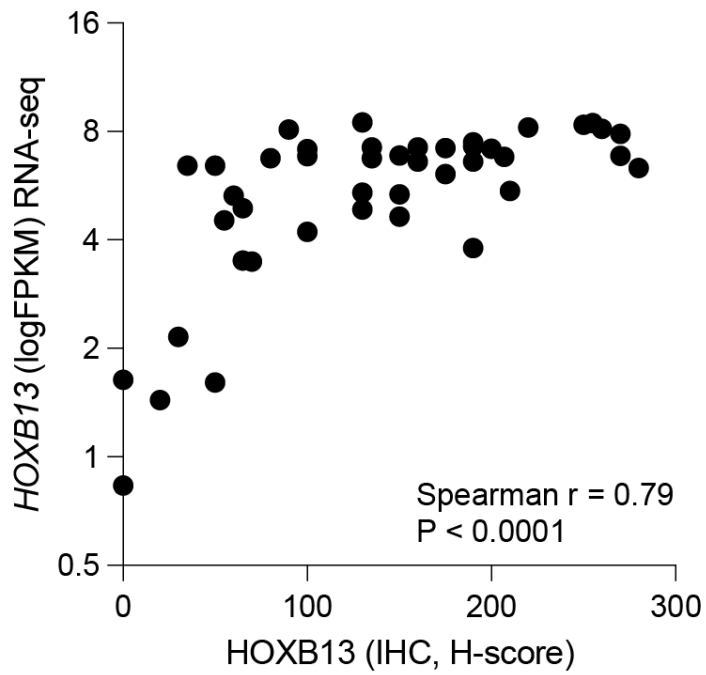

**Supplementary Figure 5.** Correlation between HOXB13 mRNA levels (determined by RNA-seq) and HOXB13 protein expression levels (determined by semiquantitative IHC) on 52 matched mCRPC metastasis samples.

Supplementary Figure 6. Patel, Sayar et al.

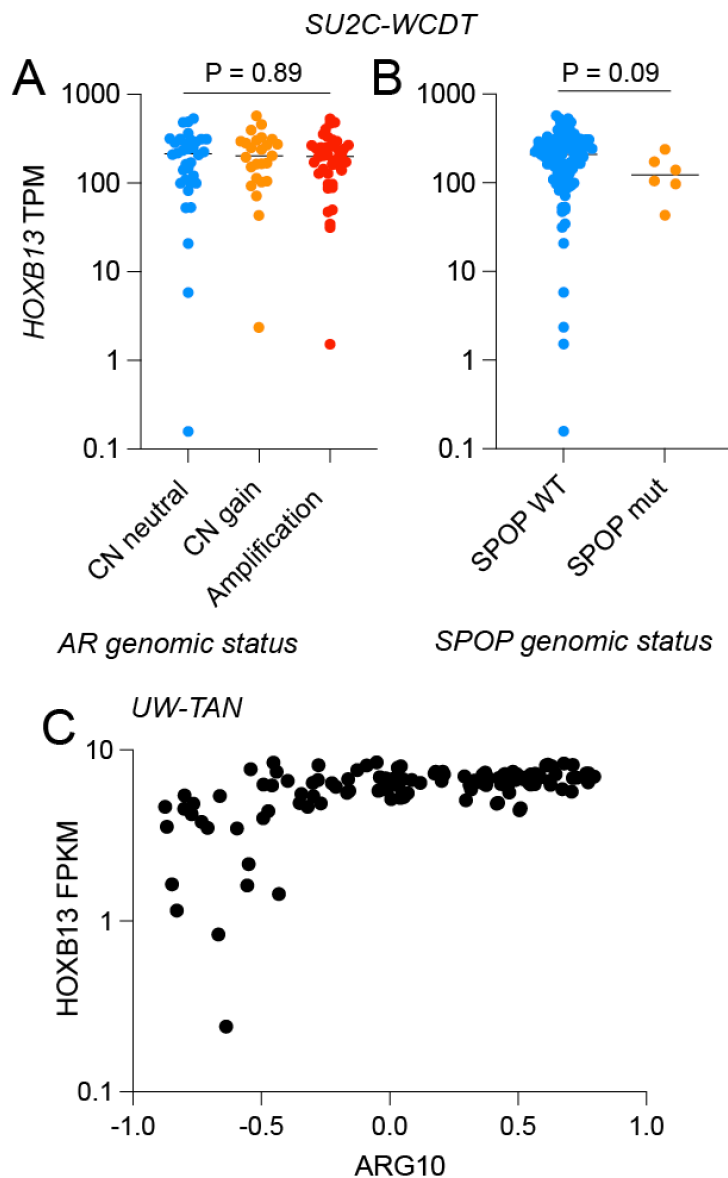

**Supplementary Figure 6.** Correlation of HOXB13 expression with genomic features. **A.** HOXB13 expression in the SU2C-WCDT (PMID: 30033370) cohort in cases with no AR locus alteration and cases with low level copy-number gain and high-level amplification. **B.** HOXB13 expression in SPOP wild type and SPOP mutant cases. **C.** Association between HOXB13 expression and AR signaling activity (as determined by the ARG10 score) in the UW-TAN cohort.



Supplementary Figure 7. Patel, Sayar et al.

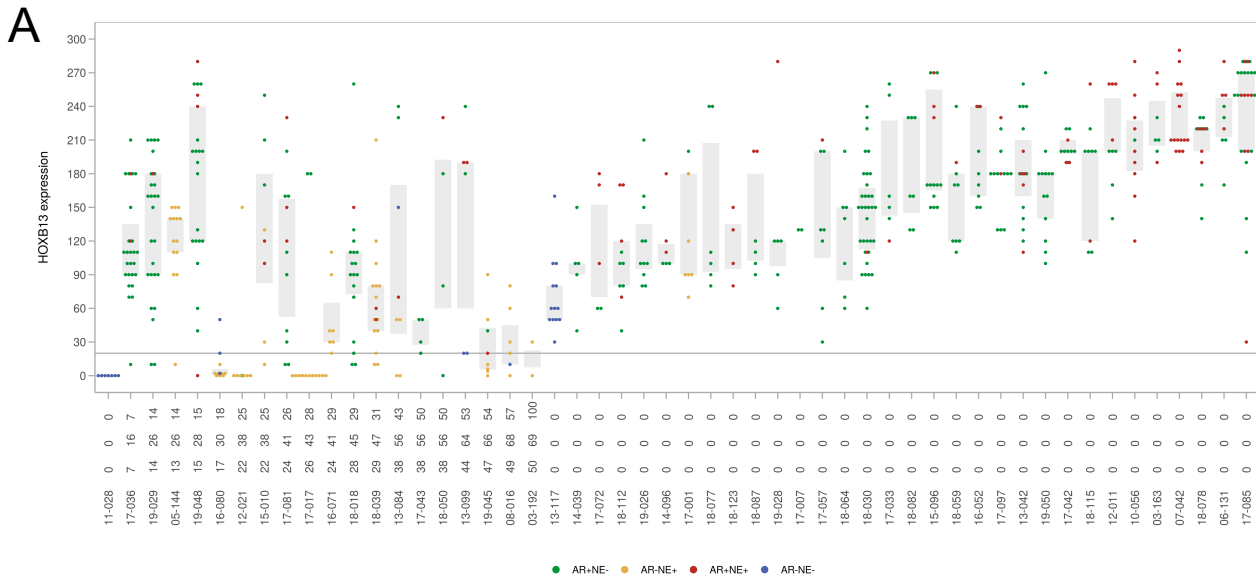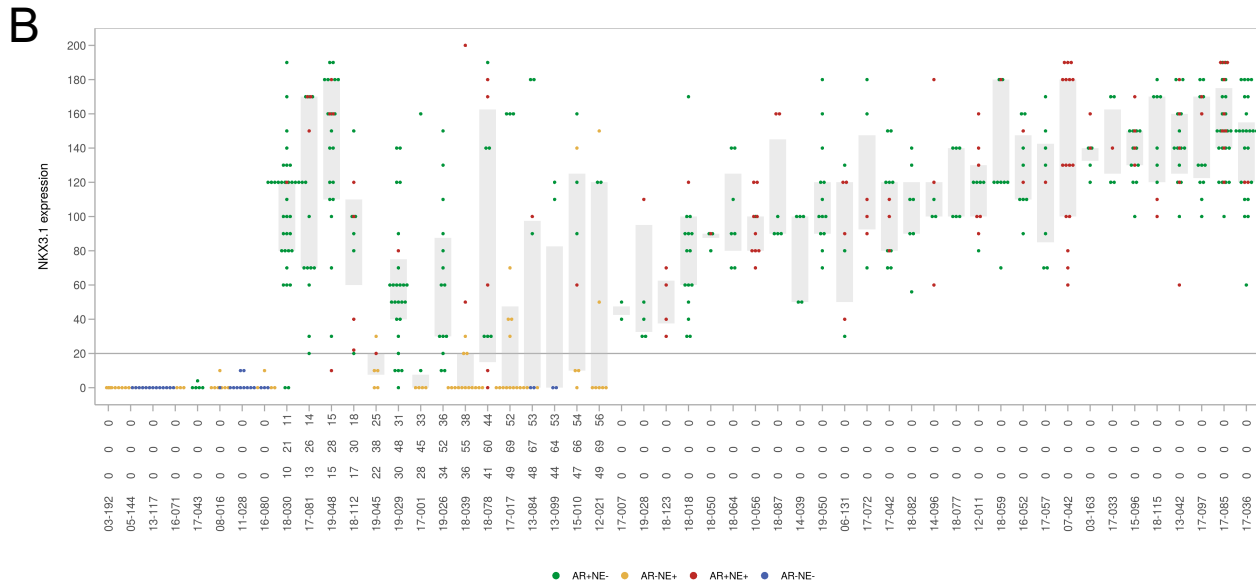

**Supplementary Figure 7. A.** Dot and box plot show the distribution of HOXB13 protein expression H-scores in 52 cases from the UW-TAN rapid autopsy cohort. Each dot represents a tumor sample; the color codes indicate the molecular subtype (AR+/NE- [green], AR-/NE+ [yellow], AR+/NE+ [red] and AR-/NE- [blue]). Gray shadings show inter-quartile ranges. **B.** Dot and box plot show the distribution of NKX3.1 protein expression H-scores. Numbers below graph indicate Shannon, Simpson and hypergeometric diversity indices.

Supplementary Figure 8. Patel, Sayar et al.

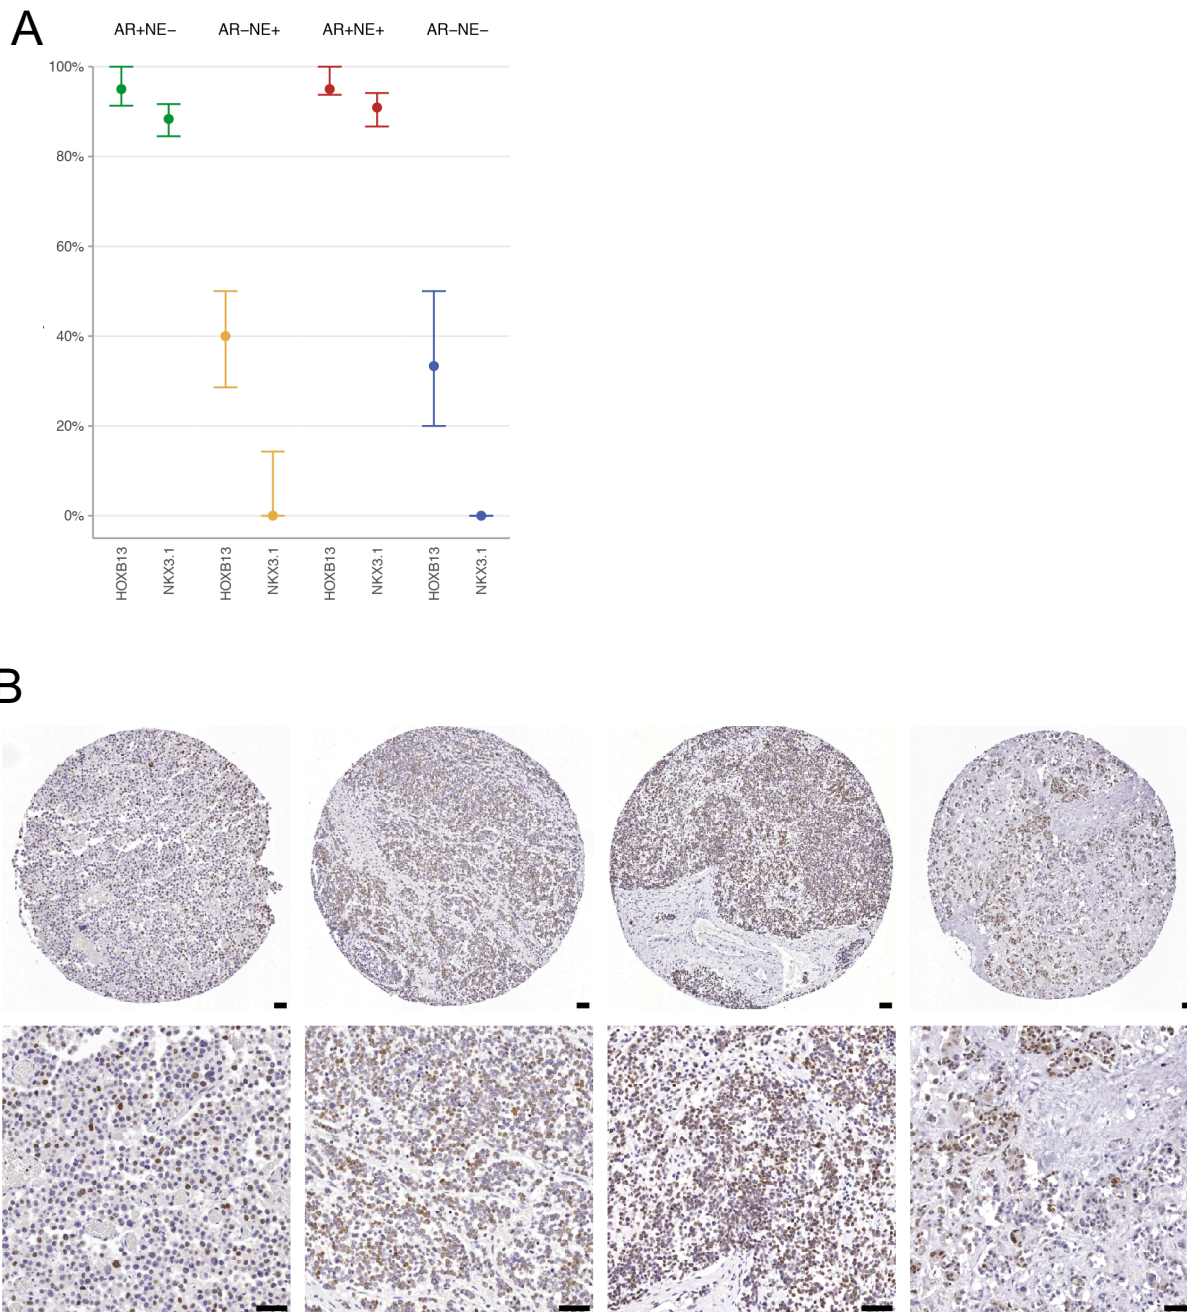

**Supplementary Figure 8. A.** Probability of positive reactivity (H-score  $\geq$  40) for HOXB13 and NKX3.1 across different molecular subtypes. **B.** Representative micrographs of tumors with an HOXB13 H-score of 40. Scale bar indicates 50  $\mu$ m.

Supplementary Figure 9. Patel, Sayar et al.

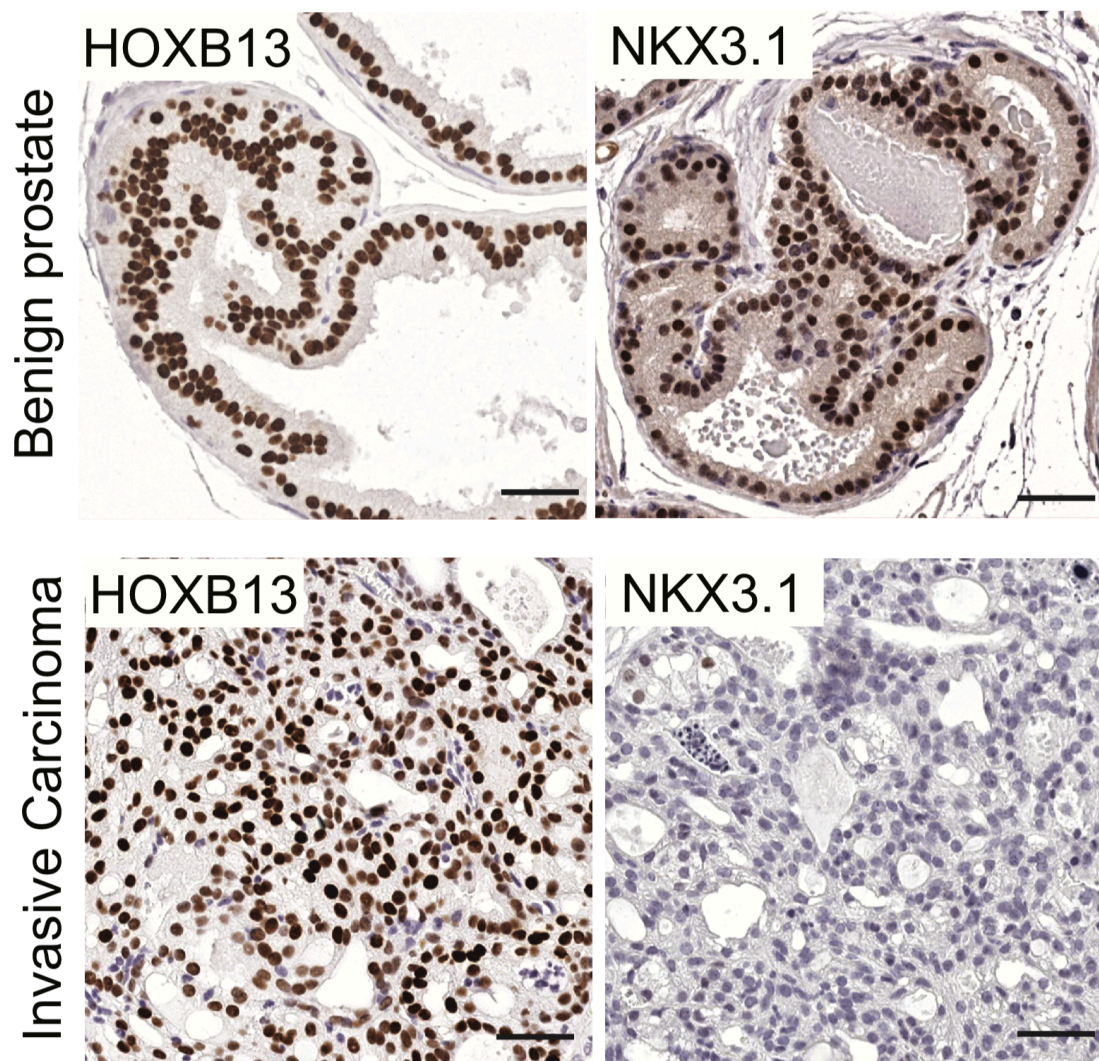

**Supplementary Figure 9.** IHC for HOXB13 and NKX3.1 in benign murine prostate tissue and SKO ( $Pten^{-/-}$ , age 61 weeks). Note the loss of NKX3.1 expression in  $Pten^{-/-}$  adenocarcinoma compared to the retained high expression of HOXB13. Scale bar indicates 50  $\mu$ m.



**Supplementary Table 1. Patel, Sayar et al.**

| Characteristic              | N = 297        |
|-----------------------------|----------------|
| Age, median (IQR)           | 59 (55, 63)    |
| Unknown                     | 16             |
| Race, n (%)                 |                |
| African-American            | 22 (7.9%)      |
| Caucasian                   | 239 (85%)      |
| Other                       | 19 (6.8%)      |
| Unknown                     | 17             |
| PSA, median (IQR)           | 6.7 (5.0, 9.4) |
| Unknown                     | 19             |
| NCCN risk group, n (%)      |                |
| low risk                    | 88 (32%)       |
| intermediate risk           | 138 (51%)      |
| high risk                   | 45 (17%)       |
| Unknown                     | 26             |
| Gleason Sum, n (%)          |                |
| 6                           | 1 (0.4%)       |
| 3+4                         | 103 (37%)      |
| 4+3                         | 102 (36%)      |
| 8                           | 52 (19%)       |
| 9-10                        | 23 (8.2%)      |
| Unknown                     | 16             |
| Stage, n (%)                |                |
| organ confined              | 127 (45%)      |
| extraprostatic extension    | 114 (41%)      |
| seminal vesicle involvement | 25 (8.9%)      |
| lymph node positive         | 14 (5.0%)      |
| Unknown                     | 17             |

**Supplementary Table 1.** Baseline clinicopathological features of the radical prostatectomy cohort.

**Supplementary Table 2.** Patel, Sayar et al.

| <b>Characteristic</b>          | <b>N</b> | <b>Beta</b> | <b>95% CI<sup>1</sup></b> | <b>p-value</b> |
|--------------------------------|----------|-------------|---------------------------|----------------|
| <b>AGE</b>                     | 281      | -0.11       | -0.69, 0.47               | 0.7            |
| <b>YEAR</b>                    | 281      |             |                           |                |
| 1997-2000                      |          | —           | —                         |                |
| 2001-2005                      |          | -2.8        | -13, 7.0                  | 0.6            |
| <b>RACE</b>                    | 280      |             |                           |                |
| White                          |          | —           | —                         |                |
| Black                          |          | -14         | -27, -0.81                | 0.037          |
| Other                          |          | 2.4         | -11, 16                   | 0.7            |
| <b>FAMILY_HISTOR<br/>Y</b>     | 226      |             |                           |                |
| No                             |          | —           | —                         |                |
| Yes                            |          | 3.6         | -4.8, 12                  | 0.4            |
| <b>BMI</b>                     | 271      | -0.54       | -1.5, 0.44                | 0.3            |
| <b>PSA</b>                     | 278      | -0.51       | -1.1, 0.05                | 0.074          |
| <b>NCCN</b>                    | 271      |             |                           |                |
| low risk                       |          | —           | —                         |                |
| intermediate risk              |          | 2.7         | -5.2, 11                  | 0.5            |
| high risk                      |          | -4.6        | -15, 6.0                  | 0.4            |
| <b>GLEASON<br/>GRADE</b>       | 281      |             |                           |                |
| 9-10                           |          | —           | —                         |                |
| 6                              |          | 12          | -47, 71                   | 0.7            |
| 3+4                            |          | 24          | 11, 38                    | <0.001         |
| 4+3                            |          | 21          | 8.0, 35                   | 0.002          |
| 8                              |          | 15          | 0.32, 29                  | 0.045          |
| <b>STAGE</b>                   | 280      |             |                           |                |
| organ confined                 |          | —           | —                         |                |
| extraprostatic<br>extension    |          | -1.2        | -8.8, 6.4                 | 0.8            |
| seminal vesicle<br>involvement |          | 2.9         | -10, 16                   | 0.7            |
| <b>LYMPH NODE<br/>POSITIVE</b> |          | -9.8        | -26, 6.8                  | 0.2            |
| <b>ADJUV_TX</b>                | 212      |             |                           |                |
| none                           |          | —           | —                         |                |
| adjuvant radiation<br>only     |          | -28         | -62, 6.2                  | 0.11           |
| adjuvant<br>radiation+ADT      |          | -20         | -79, 39                   | 0.5            |

<sup>1</sup>CI = Confidence Interval

**Supplementary Table 2.** Correlation of clinicopathological features and HOXB13 expression.

**Supplementary Table 3. Patel, Sayar et al.**

**BIOCHEMICAL RECURRENCE-FREE SURVIVAL**

| <b>Characteristic</b> | <b>N</b> | <b>HR<sup>1</sup></b> | <b>95% CI<sup>1</sup></b> | <b>p-value</b> |
|-----------------------|----------|-----------------------|---------------------------|----------------|
| <b>Gleason Grade</b>  | 218      | 1.73                  | 1.37, 2.17                | <0.001         |
| <b>HOXB13</b>         | 218      | 1.00                  | 0.99, 1.01                | 0.8            |

<sup>1</sup>HR = Hazard Ratio, CI = Confidence Interval

**METASTASIS-FREE SURVIVAL**

| <b>Characteristic</b> | <b>N</b> | <b>HR<sup>1</sup></b> | <b>95% CI<sup>1</sup></b> | <b>p-value</b> |
|-----------------------|----------|-----------------------|---------------------------|----------------|
| <b>Gleason Grade</b>  | 216      | 2.04                  | 1.37, 3.04                | <0.001         |
| <b>HOXB13</b>         | 216      | 1.00                  | 0.99, 1.01                | 0.6            |

<sup>1</sup>HR = Hazard Ratio, CI = Confidence Interval

**Supplementary Table 3.** Results from univariate analyses for patients with outcomes data.



**Supplementary Table 4.** *Patel, Sayar et al.*

Total N = 52

**Demographics data**

|                                         |                       |
|-----------------------------------------|-----------------------|
| Age at initial diagnosis (median [IQR]) | 60.61 [53.92, 66.33]  |
| PSA at diagnosis (median [IQR])         | 19.50 [7.55, 111.25]  |
| Age at death (median [IQR])             | 68.63 [61.91, 74.43]  |
| PSA at death (median [IQR])             | 90.63 [8.69, 1007.51] |

**Treatment history**

|                     |          |
|---------------------|----------|
| ADT                 | 51 ( 98) |
| Abiraterone acetate | 33 ( 65) |
| Enzalutamide        | 28 ( 55) |

**Supplementary Table 4.** Clinical characteristics of patients from the UW-TAN rapid autopsy study with IHC expression data.

**Supplementary Table 5.** Patel, Sayar et al.

| <b>Characteristic</b> | <b>N</b> | <b>HR<sup>1</sup></b> | <b>95% CI<sup>1</sup></b> | <b>p-value</b> |
|-----------------------|----------|-----------------------|---------------------------|----------------|
| HOXB13                | 267      | 0.98                  | 0.92, 1.04                | 0.5            |
| Subtype               | 267      |                       |                           |                |
| <b>AR+NE-</b>         |          | —                     | —                         |                |
| <b>AR-NE+</b>         |          | 5.83                  | 2.88, 11.8                | <0.001         |
| <b>AR+NE+</b>         |          | 1.40                  | 0.80, 2.45                | 0.2            |
| <b>AR-NE-</b>         |          | 1.24                  | 0.82, 1.88                | 0.3            |

<sup>1</sup>HR = Hazard Ratio, CI = Confidence Interval

**Supplementary Table 5.** Hazard ratios of overall survival after biopsy in the SUC2 cohort.

**Supplementary Table 6.** Patel, Sayar et al.

|                          | <b>HOXB13</b>    | <b>PSA</b>                  | <b>NKX3.1</b> | <b>HMWCK</b>  |
|--------------------------|------------------|-----------------------------|---------------|---------------|
| Prostatic adenocarcinoma | 34/34 (100%)     | 37/38 (97.4%)               | 35/38 (92.1%) | 0/38 (0%)     |
| Urothelial Carcinoma     | 0/35 (0%)        | 0/35 (0%)                   | 0/35 (0%)     | 24/35 (68.6%) |
|                          | <hr/> This study | <hr/> Ai-Ying Chuang et al. | <hr/>         | <hr/>         |

**Supplementary Table 6.** Comparison of HOXB13 and other markers in the differential diagnosis of prostatic adenocarcinoma versus high grade urothelial carcinoma. HOXB13 was assessed as part of this study. PSA, NKX3.1 and HMWCK expression data were acquired on the same case material and were reported previously by Ai-Ying Chuang et al. (PMID: 17667550). Note that 4 prostate cancer cases were not evaluable for HOXB13 due to the absence of tumor cell on deeper TMA sections used in this study. For percentage evaluation, the entire case was considered negative if any TMA spot in a case was not reactive for the respective marker.
